# Supplementary material for: A coarse pixel scale ground "truth" dataset based on the global in situ site measurements to support validation and bias correction of satellite surface albedo products
Source: Copernicus journal article supplement (doi:10.5194/essd-2023-220), 2023-07-12
Supplement: Supplementary file [file essd-2023-220-AC2-supplement.pdf]

## Response to comments

**Paper #:** essd-2023-220

**Title:** A coarse pixel scale ground “truth” dataset based on the global in situ site measurements to support validation and bias correction of satellite surface albedo products

5 **Journal:** Earth System Science Data

10 Thank you for providing us with so many valuable suggestions and they do help improve the paper. According to the reviewers’ comments and suggestions, we revised the paper carefully and tried to give satisfactory answers to the reviewers’ questions. The corresponding modifications are highlighted in red font in the revised paper.

The summaries of the revision for this paper are as follows:

First, we have reorganized the data and added all available sites. Moreover, parts of results and discussion, main findings and conclusion, as well as the abstract were rewritten based on the complete dataset.

15 Second, the necessity for upscaling models was further elucidated by integrating the work of other researchers in **Introduction** and **Conclusion**. Furthermore, we discussed the applicability of upscaling models at various sites and provided an objective statement about the role and significance of the pixel scale ground “truth” dataset. Its relationship with existing satellite albedo products and ground measurements was also explained.

20 Third, we have added the quantification of uncertainty of upscaling models for each site in **Section 4.1**. Moreover, we have described how we addressed the issue of varying footprint sizes at distinct sites, as well as the rationale for implementing ETM+ imagery.

25 Fourth, we have explained the spatial and temporal resolution of the different data used in the methodology and conclusions, and added a detailed description of the illumination geometry, including black-sky albedo, and white-sky albedo, for the albedo products used. Additionally, we have clarified the sample size for the boxplots and re-examined the implications regarding sample size in the **Results** and **Discussion** section.

Fifth, we have explained the reason for the methodology Section being similar to those of Wu et al.(2020), and emphasized the importance of the content of our work.

30 Sixth, we have corrected typing errors; complemented supporting evidence and literature; improved charts and figures; and corrected spelling and grammatical errors in this paper.

For the specific comments for each reviewer, we have made a detailed reply as follows.

### Reviewer #1

35 The dataset based on upscaling could be very useful for the community, as it is a huge compilation of data from 368 sites mainly distributed in North hemisphere (mainly North of America and Europe). However, I miss a representativeness over Australia, where there are already available a large quantity of networks

providing *in situ* albedo measurements.

40 Re: Great thanks for the positive comments. We have added the *in situ* albedo measurements over Australia in the revised manuscript. Moreover, the *in situ* measurements over Siberia and other regions with effective measurements were also included in the dataset. The number of *in situ* sites increased to 416 for the dataset. The distribution of these *in situ* sites is shown as follows:

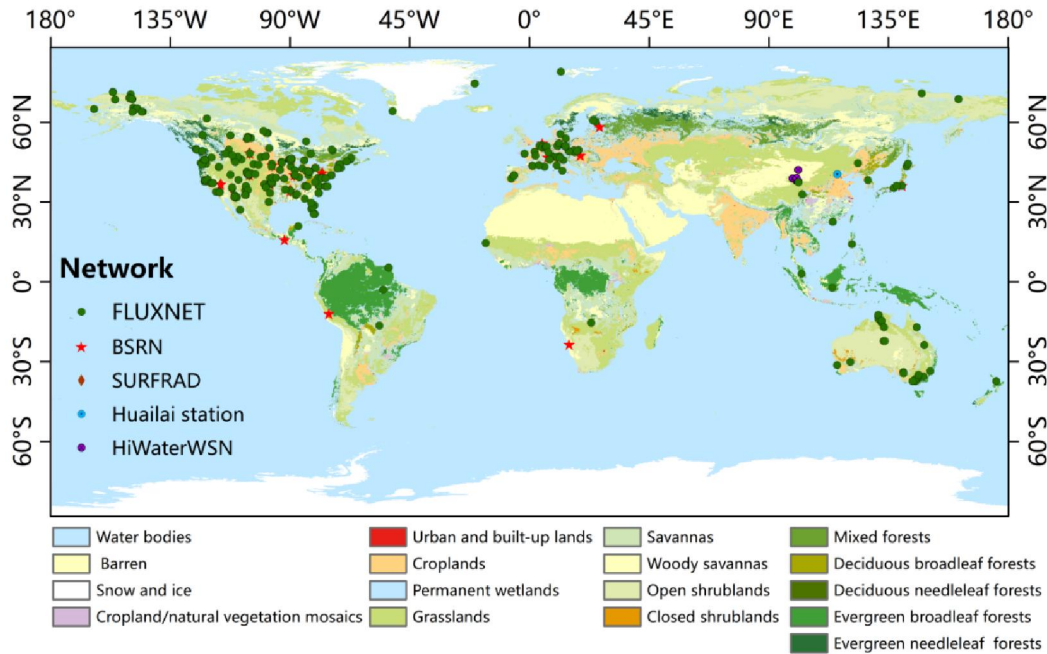

Figure 1: The distribution of the 416 *in situ* sites over different land cover types.

45

Optimism about the fact of the need for upscaling techniques should be toned down, as it is not a need as community-agreed validation protocols recommend the use of *in situ* tower measurements, as they are the real ‘truth’. The upscaling approach could be useful for heterogeneous areas, allowing increasing the representativeness of the sampling for direct validation at global scale.

50

Re: We are sorry for not making it clear to readers. As pointed out by the reviewer, the upscaling approach is useful for heterogeneous areas as it increases the representativeness of the sampling for direct validation. But it is not necessary over homogeneous land surfaces because *in situ* measurements are spatially representative in this case, and the utilization of upscaling model does not bring benefits as the upscaling model itself has uncertainty.

55

In order to clarify this point, we have added a paragraph as “It is important to note that the absolute truth on the coarse pixel scale is unattainable due to the limitations in instruments and measurement methods as well as the uncertainty of the upscaling model (Wu et al., 2019; Wen et al., 2022). Instead, the relative truth can be used to approximate the absolute truth. What can be done is to improve the accuracy of pixel scale relative truth (also denoted as “truth”) as much as possible. For instance, the *in situ* measurements can be directly used as the pixel scale reference over homogeneous surfaces or in the case

60

65 *that the satellite acquisition and in situ measurement footprints are similar, and the upscaling model is not necessary as it has its own source of uncertainty. But the upscaling model is useful for heterogeneous areas when in situ measurement footprints are less than satellite pixel size, because it increases the representativeness of the sampling for direct validation. The accuracy assessment results of pixel scale ground “truth” dataset demonstrate that the accuracy of reference data can be enhanced by 17.09 % over the regions with strong spatial heterogeneity. However, the degree of improvement with this dataset displays a decreasing trend as the reduction of spatial heterogeneity. At a global scale, the pixel scale ground “truth” dataset enhances the accuracy of pixel scale reference data in general, with the overall RRMSE decreased by 6.04 % compared to in situ single site measurements.” in **Conclusion**.*

70

However, this approach introduces other sources of uncertainties, as the uncertainty of satellite high-resolution input is propagated and higher than *in situ* measurements. I miss this aspect in the dataset (the uncertainty should be provided).

75 **Re:** It is true that the upscaling model has its own source of uncertainty. As recommended by the reviewer, we have added the information on the uncertainty of the upscaling approach for each site in **Section 4.1** as follows. The specific values of the uncertainty of the upscaling model have been shown in the file at the link to the dataset, where each site is quantified separately.

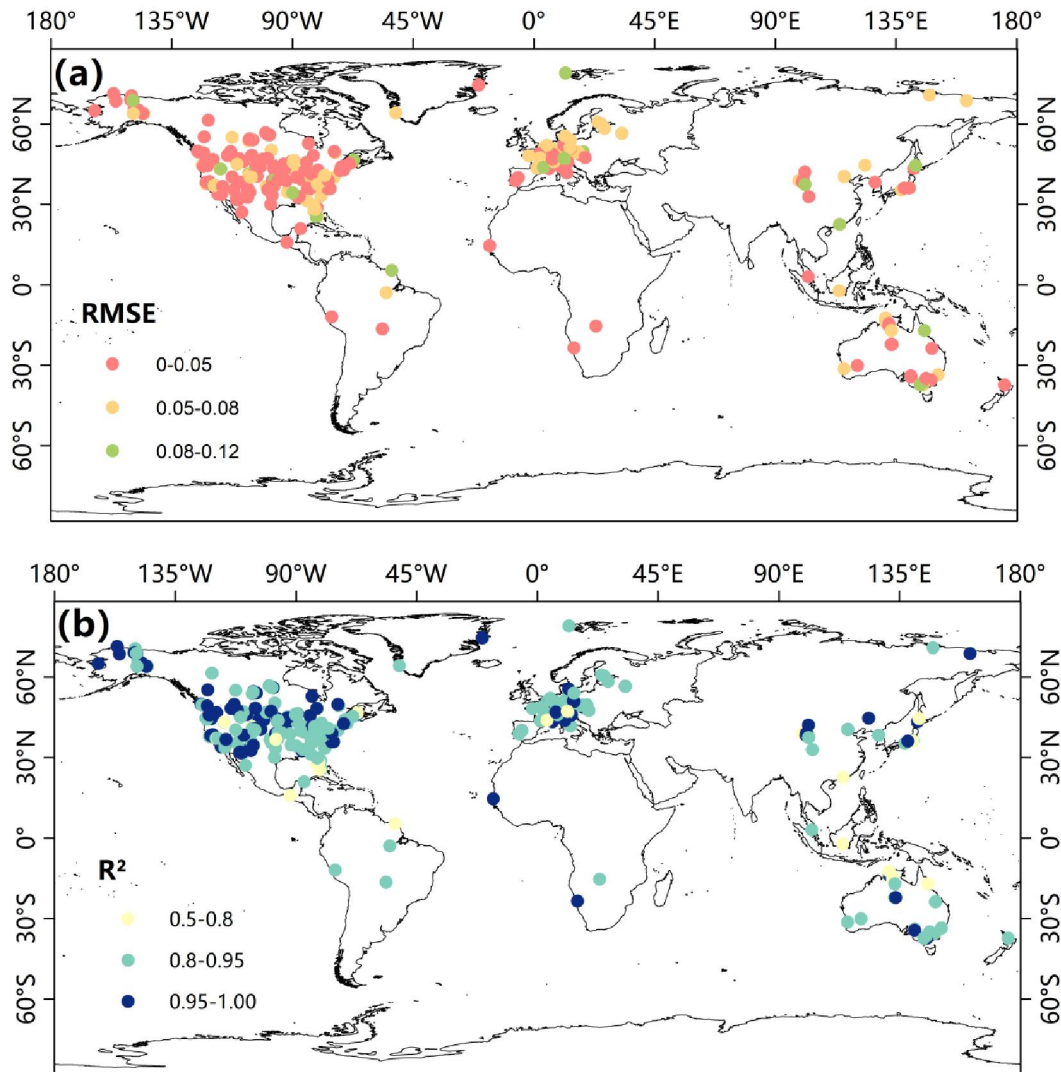

Figure 5: Spatial distribution of RMSE (a) and  $R^2$  (b) of the upscaling model.

80 To be compliant with the concept of ‘fiducial reference data’, the uncertainties should be quantified and provided along with the reference dataset for conformity testing of satellite products.

Re: Thanks very much for this good suggestion. The uncertainty of the dataset has been quantified and provided along with the reference dataset as we explained above.

85 It is well-known that upscaling introduces additional sources of uncertainties. The next generation of satellites will reduce the spatial resolution of global coarse resolution products, allowing the use of point *in situ* data. Then, it should be discussed the originality of this datasets for future applications.

Re: It is true that the next generation of satellites will allow the generation of high-resolution products which are comparable to *in situ* data. But the current coarse resolution products record the information in the past and will serve as an important component to form the long time series of satellite data, which is quite important to study global change from a long-term perspective. Hence, this dataset is still useful to

90

validate or correct the errors of these coarse resolution satellite albedo products.

Based on the validation results of the method, the upscaling maps show similar uncertainty (RMSE) than existing albedo satellite products when they are compared with direct *in situ* measurements. Then, the upscaling method provides a useful approach to increase the number of sample for direct validation purpose but it cannot be considered as real ‘truth’. This should be clearly demonstrated.

Re: Yes, our dataset is relative truth, not absolute truth. In fact, the absolute truth on the coarse pixel scale is unattainable due to the limitations in instruments and measurement methods as well as the uncertainty of the upscaling model (Wu et al., 2019; Wen et al., 2022). Instead, the relative truth can be used to approximate the absolute truth. This point has been clearly demonstrated in the revised manuscript as “*It is important to note that the absolute truth on the coarse pixel scale is unattainable due to the limitations in instruments and measurement methods as well as the uncertainty of the upscaling model (Wu et al., 2019; Wen et al., 2022). Instead, the relative truth can be used to approximate the absolute truth. What can be done is to improve the accuracy of pixel scale relative truth (also denoted as “truth”) as much as possible. For instance, the in situ measurements can be directly used as the pixel scale reference over homogeneous surfaces or in the case that the satellite acquisition and in situ measurement footprints are similar, and the upscaling model is not necessary as it has its own source of uncertainty. But the upscaling model is useful for heterogeneous areas when in situ measurement footprints are less than satellite pixel size, because it increases the representativeness of the sampling for direct validation.*” in **Conclusion**.

Additionally, I recommend reviewing the use of the English language along the manuscript. The presentation of the methods and results should be presented more clearly. It would be necessary to specify which datasets, quantities and resolutions (spatial and temporal) used in each step.

Re: Thanks for your nice suggestion. The language of the paper has been polished by a native speaker. Regarding the specific information about the dataset used in each step, we have summarized this information as tables.

**Table 1.** The information on the data used in the upscaling process

| Symbols                                 | Meaning                                                                       | Spatial resolution | Temporal resolution                                            |
|-----------------------------------------|-------------------------------------------------------------------------------|--------------------|----------------------------------------------------------------|
| $\theta_{\text{ETM+}_{\text{in situ}}}$ | ETM+ pixel albedo time series corresponding to <i>in situ</i> site            | 30 m               | Daily data throughout the whole time series (i.e., 2012-2018). |
| $\theta_{\text{ETM+}}$                  | ETM+ pixel albedo at other areas within a coarse pixel                        | 30 m               | Daily data throughout the whole time series (i.e., 2012-2018). |
| $\theta_{\text{in situ}_{\text{ETM+}}}$ | In situ reporting of surface albedo for each ETM+ pixel within a coarse pixel | 30 m               | Daily data throughout the whole time series (i.e., 2000-2021). |

|                     |                            |                                                               |                                                                |
|---------------------|----------------------------|---------------------------------------------------------------|----------------------------------------------------------------|
| $\theta_{in\ situ}$ | In situ albedo measurement | with varying spatial resolution but near the ETM+ pixel scale | Daily data throughout the whole time series (i.e., 2000-2021). |
|---------------------|----------------------------|---------------------------------------------------------------|----------------------------------------------------------------|

**Table 2.** The information on the data used in the evaluation of the upscaling model

| Symbols              | Meaning                                                                         | Spatial resolution | Temporal resolution                                            |
|----------------------|---------------------------------------------------------------------------------|--------------------|----------------------------------------------------------------|
| $\theta_{RETM+}$     | ETM+ simulated pixel albedo based on upscaling coefficients and $\theta_{ETM+}$ | 30 m               | Daily data throughout the whole time series (i.e., 2019-2021). |
| $\theta_{ETM+}$      | the ETM+ pixel albedo containing <i>in situ</i> site                            | 30 m               | Daily data throughout the whole time series (i.e., 2019-2021). |
| $\theta_{upscaling}$ | upscaling results based on the $\theta_{ETM+}$ and upscaling coefficients       | 500 m              | Daily data throughout the whole time series (i.e., 2019-2021). |
| $\theta_{reference}$ | reference coarse pixel scale albedo                                             | 500 m              | Daily data throughout the whole time series (i.e., 2019-2021). |

120

**Table 3.** The information of the data used in the assessment of coarse pixel scale ground “truth”

| Symbols                  | Meaning                                   | Spatial resolution | Temporal resolution                                            |
|--------------------------|-------------------------------------------|--------------------|----------------------------------------------------------------|
| $\theta_{in\ situ\_ref}$ | coarse pixel scale ground “truth” dataset | 500 m              | Daily data throughout the whole time series (i.e., 2000-2021). |
| $\theta_{reference}$     | reference coarse pixel scale albedo       | 500 m              | Daily data throughout the whole time series (i.e., 2000-2021). |

### Specific comments

125 What do you mean by ‘bias correction’? *In situ* measurements support validation of satellite products, providing useful data for bias quantification of satellite products. I am not sure how *in situ* measurement could be used to correct the bias of a satellite product.

130 Re: “Bias correction” is a statistical technique used in data analysis. It is employed to rectify systematic errors, commonly known as biases, in a dataset. These errors can stem from several sources, such as sensor inaccuracies, measurement methods, or modeling assumptions. The objective of bias correction is to enhance data precision and reliability by eliminating or minimizing these systematic errors.

Since the pixel scale ground “truth” dataset has been established, on one hand, it can be used to assess the errors of satellite products; on the other hand, it can correct these errors through the models such as random forests, cumulative distribution function, and Kalman filter. For further reading on bias correction, the related articles can be seen below:

135 **References:**

Atiah, W. A., Johnson, R., Muthoni, F. K., Tsidu, G. M., Amekudzi, . K., Kwabena, O., and Kizito, F.: **Bias Correction** and Spatial Disaggregation of Satellite-Based Data for the Detection of Rainfall Seasonality Indices, *Heliyon*, 9, e17604, <http://dx.doi.org/10.2139/ssrn.4349361>, 2023.

140 Wang, J., Wu, X., Tang, R., Zeng, Q., Li, Z., Wen, J., and Xiao, Q.: Evaluation of three **error-correction** models based on the matched pixel scale ground “truth”: A case study of MCD43A3 V006 over the Heihe River Basin, China, *IEEE Journal of Selected Topics in Applied Earth Observations and Remote Sensing*, 15, 8785-8797, <https://doi.org/10.1109/JSTARS.2022.3213184>, 2022.

Iqbal, Z., Shahid, S., Ahmed, K., Wang, X., Ismail, T., and GGabriel, H. F.: **Bias correction** method of high-resolution satellite-based precipitation product for Peninsular Malaysia, *Theoretical and Applied Climatology*, 148, 1429–1446, <https://doi.org/10.1007/s00704-022-04007-6>, 2022.

145 Katiraie-Boroujerdy, P.-S., Rahnamay Naeini, M., Akbari Asanjan, A., Chavoshian, A., Hsu, K.-L., and Sorooshian, S.: **Bias Correction** of Satellite-Based Precipitation Estimations Using Quantile Mapping Approach in Different Climate Regions of Iran, *Remote Sensing*, 12, 2102, <https://doi.org/10.3390/rs12132102>, 2020.

150 Line 13: Same comment as before in regard to ‘bias correction’. Justify the use of the ‘correction term’ or modify by bias quantification.

Re: Explained in the previous question.

Line 14: What satellite measurements are you referring? Low, medium or high (decametric) instruments.

155 Re: It refers to satellite data with low spatial resolution.

Line 16: Justify the need for upscaling. If satellite acquisition and *in situ* measurement footprints are similar the upscaling introduces additional sources of uncertainties.

160 Re: It is true that the upscaling introduces additional sources of uncertainties if satellite acquisition and *in situ* measurement footprints are similar. In the revised manuscript, this sentence has been revised as “*The results demonstrate that using this dataset in validation outperforms the direct comparison between satellite and in situ site measurements over heterogeneous surfaces when in situ measurement footprints are less than satellite pixel size.*”.

165 Furthermore, we have made it clear that the upscaling model is not necessary over homogeneous surfaces or in the case that the satellite acquisition and *in situ* measurement footprints are similar in **Conclusion** as “.....*the in situ measurements can be directly used as the pixel scale reference over*



170 *homogeneous surfaces or in the case that the satellite acquisition and in situ measurement footprints are similar, and the upscaling model is not necessary as it has its own source of uncertainty. But the upscaling model is useful for heterogeneous areas when in situ measurement footprints are less than satellite pixel size.....”.*

Lines 55-56: The community-agreed surface albedo validation protocol (CEOS Working Group on Calibration and Validation – Land Product Validation subgroup) disagreed with this affirmation. Ground measurement can be directly used to validate satellite pixels. The current community-agreed approach is based on the evaluation of the spatial representativeness of ground measurement (Román et al., 2010, 2009).

175 Reference: CEOS LPV albedo protocol:  
[https://lpvs.gsfc.nasa.gov/PDF/CEOS\\_ALBEDO\\_Protocol\\_20190307\\_v1.pdf](https://lpvs.gsfc.nasa.gov/PDF/CEOS_ALBEDO_Protocol_20190307_v1.pdf).

180 Re: It is true that the ground measurement can be directly used to validate satellite pixels after proving that *in situ* measurements are spatially representative. However, the representative site are only limited to a few locations on the globe and cover discrete time periods, which cannot support a comprehensive validation and bias correction over a wide range of conditions (Loew et al., 2016). Upscaling procedure is necessary for heterogeneous areas when *in situ* measurement footprints are less than satellite pixel size. Hence, our dataset can be considered as an important addition to the reference data on the coarse pixel scale. In order to clarify this point, we have added the sentence as “*Currently, a community-based validation tool, such as SALVAL (Sánchez-Zapero et al., 2023), could provide a framework for undertaking performance assessments through well-defined and uniform procedures, metrics and reference observations for all involved datasets, resulting in increased comparability, in addition to the ability to import new product datasets. Our dataset, obtained through standardized operational procedures, permits expanding established datasets to spatially underrepresented sites.*” in **Conclusion**.

190

Lines 56-57: ‘Limited by the means and methods of ground measurement, the absolute truth on the coarse pixel scale cannot be obtained.’ Justify this sentence.

195 Re: This sentence has been removed from the paper. Instead, this point has been clarified in **Conclusion** as “*It is important to note that the absolute truth on the coarse pixel scale is unattainable due to the limitations in instruments and measurement methods as well as the uncertainty of the upscaling model (Wu et al., 2019; Wen et al., 2022). Instead, the relative truth can be used to approximate the absolute truth.*”.

200 The reason that the absolute truth on the coarse pixel scale being unattainable can be explained from the following aspects. First, *in situ* measurements inevitably suffer from errors (random errors and systematic errors). The systematic errors can be corrected through calibration. While the random error can be reduced with repeated measurements, the repeatability in the exactly same conditions is hard to implement in the natural environment. Second, the scale of *in situ* measurements is generally less than



satellite pixel size and lacks representativeness due to spatial heterogeneity. Third, the upscaling procedure  
205 suffers from its own source of uncertainty.

Lines 65-67: ‘However, *in situ* measurements cannot be directly used as the coarse pixel scale truth given  
that the footprint of *in situ* sites is far less than the scale of a coarse pixel.’ Please justify this or rephrase this  
sentence. *In situ* measurement footprint depends on the tower height. Depending of tower height and  
210 satellite spatial resolution they can be compared.

Re: This sentence has been rephrased as “*However, in situ measurements cannot be directly used as the  
coarse pixel scale truth if the footprint of in situ sites (depending on tower height) is far less than the scale  
of a coarse pixel.*”.

Lines 115-118: ‘These radiometers have been rigorously calibrated and continuously supervised to reduce  
systematic measurement errors (Jia et al., 2013; Wang et al., 2009; Zhou et al., 2016).’ Are you confident  
that all radiometers from 368 sites have been rigorously calibrated and continuously supervised? This is not  
the case based on the references you are providing.

Re: In fact, most of these radiometers have been rigorously calibrated and continuously supervised. To  
220 remove the effect of *in situ* measurement uncertainty caused by the lack of strict calibration or supervision,  
we have made a quality control of *in situ* measurements. The outliers have been removed. Furthermore, the  
possible effects of unstable lighting on flux measurements were also minimized by using the ratio of the  
mean upward radiation to the mean downward radiation around local solar noon (11:00–13:00) as suggested  
by Lin et al. (2022). In order to clarify this, we have added the sentence as “*To reduce the possible effects of  
225 unstable lighting on flux measurements and align with satellite albedo products that generally report local  
solar noon albedo, in situ site measured albedo was calculated using the ratio of the mean upward  
radiation to the mean downward radiation around local solar noon (11:00–13:00) as suggested by Lin et al.  
(2022).*” in **Section 2.1**.

230 Lines 118-120: Justify the use of measurement at the local solar noon.

Re: The reasons for using measurement at the local solar noon are as follows:

First, satellite albedo products such as MCD43A3 V061 typically provide local noon solar albedo;

Second, surface albedo (especially black-sky albedo) is sensitive to the sun zenith angle, and the  
temporal variation of surface albedo around local solar noon is minimal, which is helpful for the temporal  
235 match between *in situ* and satellite measurements.

To clarify this point, the corresponding part has been revised as “*To reduce the possible effects of unstable  
lighting on flux measurements and align with satellite albedo products that generally report local solar noon  
albedo, in situ site measured albedo was calculated using the ratio of the mean upward radiation to the mean  
downward radiation around local solar noon (11:00 - 13:00) as suggested by Lin et al. (2022).*” in **Section 2.1**.

240

The formula proposed to combine WSA and BSA used the diffuse light ratio, which is an approximation. The actual diffuse solar radiation should be used, as is the real model considering the actual environment (as you said), as considers the real atmospheric state.

245 Justify the use of this approximation, including the uncertainties introduced in this step. The limitations over snow targets should be also discussed.

I cannot find the formula used to calculate sky diffuse light ratio in the provided reference (Stokes and Schwartz (1994)). Please, use the right reference.

Re: The use of this approximation can be explained from the following aspects:

250 First, the *in situ* sites used in this paper cover a wide range of environmental conditions (geographic locations, atmospheric model, aerosol model, spatial homogeneity and heterogeneity, temporal variation characteristics). Hence, the input parameters for the physical models such as 6S and MODTRAN are difficult to be precisely set.

Second, the formula we employed is simple, in which the sky diffuse light ratio is merely a function of the solar zenith angle at local solar noon. Hence, it can be applied to all of these *in situ* sites.

255 Third, although the formula is an empirical function, it has been widely accepted and used in previous studies (An et al., 2022; Mao et al., 2022; Wang et al., 2014; Lewis and Barnsley, 1994). These right references have been used in the revised manuscript.

260 Regarding the limitations over snow targets, it is true that the underlying assumption of an isotropic distribution of the diffuse skylight cannot be fully satisfied, but it avoids the expense of an exact calculation while capturing the major part of the phenomenon (Pinker and Laszlo, 1992). Moreover, Lucht et al. (2000) also pointed out that the fraction of diffuse to total irradiation can be parameterized in a relatively simple way at least for moderate solar zenith angles. In order to clarify this point, we have added the sentence as “*In this study, we approximated the proportion of diffuse irradiation as a function of the cosine of the solar zenith angle at noon using an empirical statistical equation (i.e., Eq. (3)). Although this equation is approximate, it avoids the excessive amount of calculation while capturing the major phenomenon (Pinker and Laszlo, 1992). In fact, this empirical function has been widely used by previous studies (An et al., 2022; Mao et al., 2022; Wang et al., 2014b; Lewis and Barnsley, 1994).*” in **Section 2.3**.

### References:

- 270 An, Y., Meng, X., Zhao, L., Li, Z., Wang, S., Shang, L., Chen, H., and Lyu, S.: Evaluation of surface albedo over the Tibetan Plateau simulated by CMIP5 models using in-situ measurements and MODIS. *International Journal of Climatology*, 42(2), 928–951, <https://doi.org/10.1002/joc.7281>, 2022.
- Mao, T., Shangguan, W., Li, Q., Li, L., Zhang, Y., Huang, F., Li, J., Liu, W., and Zhang, R.: A Spatial Downscaling Method for Remote Sensing Soil Moisture Based on Random Forest Considering Soil Moisture Memory and Mass Conservation, *Remote Sensing*, 14, 3858, <https://doi.org/10.3390/rs14163858>, 2022.

- 275 Wang, L., Zheng, X., Sun, L., Liu, Q., and Liu, S.: Validation of GLASS albedo product through Landsat TM data and ground measurements, *Journal of Remote Sensing*, 18(3), 547-558, <https://doi.org/10.11834/jrs.20143130>, 2014.
- Lewis, P., and Barnsley, M. J.: Influence of the sky radiance distribution on various formulations of the Earth surface albedo, *International Symposium on Physical Measurements and Signatures in Remote Sensing*, 17-22, 707-715, available at: <http://www2.geog.ucl.ac.uk/~plewis/LewisBarnsley1994.pdf> (last access: 23 September 2023), 1994.
- 280 Pinker, R. T., and Laszlo, I.: Modeling Surface Solar Irradiance for Satellite Applications on a Global Scale, *Journal of Applied Meteorology and Climatology*, 31(2), 194-211, [https://doi.org/10.1175/1520-0450\(1992\)031<0194:MSSIFS>2.0.CO;2](https://doi.org/10.1175/1520-0450(1992)031<0194:MSSIFS>2.0.CO;2), 1992
- Lucht, W, Schaaf, C. B., and Strahler, A. H.: An algorithm for the retrieval of albedo from space using semiempirical BRDF models, *IEEE Transactions on Geoscience and Remote Sensing*, 38(2), 977-998,
- 285 <https://doi.org/10.1109/36.841980>, 2000.

Not clear what definition of satellite product is used according to illumination geometry (black-sky, white-sky)? Please provide more details about that.

Re: The blue-sky albedo which encompasses both direct and diffuse components and denotes the land surface albedo under actual atmospheric conditions, was used in this study.

- 290 The MCD43A3 V061 product was used as an example of coarse-resolution satellite albedo products. This product provides local solar noon black sky albedo (BSA) and white sky albedo (WSA). The blue-sky albedo under the actual environment can be calculated as a linear combination of BSA and WSA through the proportion of diffuse irradiation. To clarify this point, we have revised the sentence as “*The blue-sky albedo encompasses both direct and diffuse components, characterizing the albedo of the surface under*
- 295 *actual atmospheric conditions. It can be expressed as a linear combination of BSA and WSA with an assumption of isotropic distribution of diffuse radiation. In this study, the following equation is used to calculate the MODIS blue-sky albedo.....*” in **Section 2.3**.

- The Landsat ETM+ albedo was used as an example of high-resolution albedo products. The method we employed directly calculates the blue-sky albedo. For clarification, we have revised the sentence as “*In this*
- 300 *study, we employed the following equation to calculate shortwave blue-sky albedo estimates.*” in **Section 2.1**.

lines 177-189: This part does not correspond to ancillary data. Here you are describing the spatial heterogeneity metric (std) that should be moved to the ‘methodology’ section.

- 305 Re: As suggested by the reviewer, the description of spatial heterogeneity metric (std) has been moved to the methodology section (i.e., **Section 3.2.3**).

I miss a diagram clearly showing the process of the upscaling model.

Re: The process of the upscaling method is shown as follows.

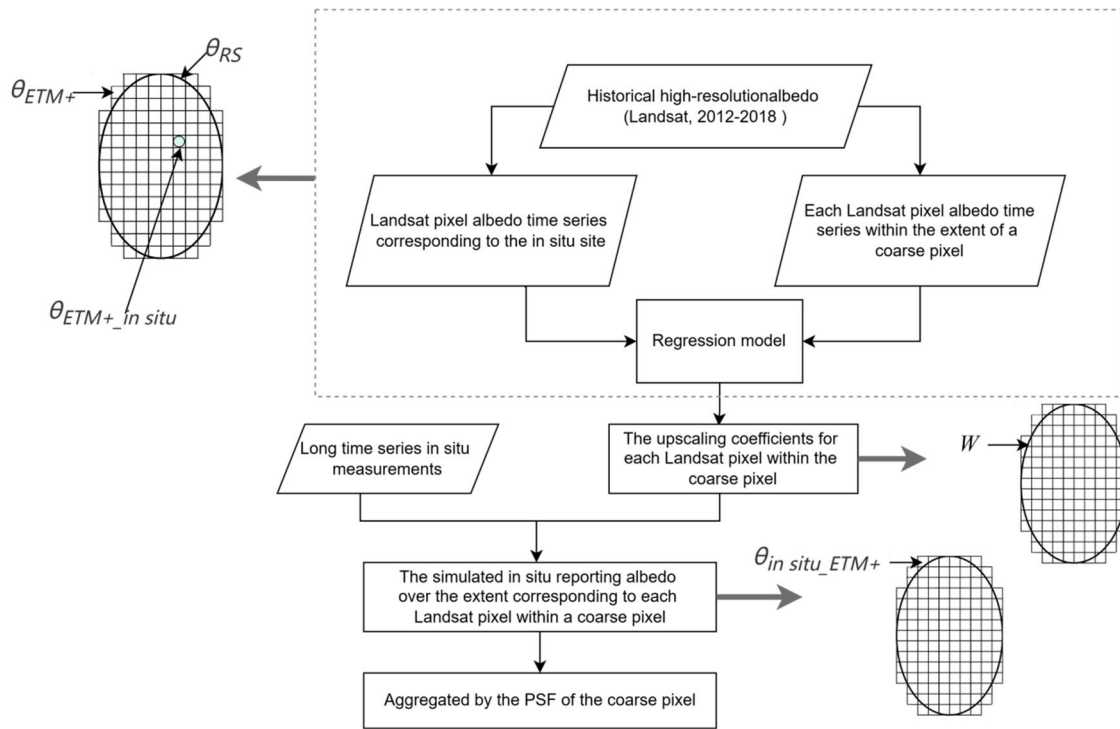

**Figure. Framework of the upscaling method.**

However, since the paper was focused on the comprehensive evaluation of the upscaling model and the development of the pixel scale ground “truth” dataset, the flowchart of the upscaling method itself was not shown in the revised manuscript.

315

The performance of the upscaling model shows that the uncertainty (RMSE) of the upscaled maps is typically between 0.03 and 0.05, which is the typical uncertainty of the surface albedo coarse resolution satellite products (e.g., MCD43A3, GLASS, GlobAlbedo, C3S SPOT/VGT, C3S PROBA-V, C3S Sentinel-3). In conclusion, the uncertainty of the upscaled maps is similar to any other product and it is questionable its utility as a reference ‘ground-truth’.

320

Re: It is true that the upscaling model itself has errors because it suffers from its own source of uncertainty. Therefore, over homogeneous surfaces where *in situ* site measurements are spatially representative, using this upscaling model will bring no benefits or even counteract due to the errors of the upscaling model. Nevertheless, over the heterogeneous surface where *in situ* sites are lack of spatial representativeness, the benefits outweigh disadvantages. The accuracy assessment results of the coarse pixel scale ground “truth” dataset demonstrate that the accuracy of reference data can be enhanced by 17.09 % over the regions with strong spatial heterogeneity. However, the degree of improvement with this dataset displays a decreasing trend as the reduction of spatial heterogeneity. In order to clarify this point, we have added the paragraph “.....*For instance, the in situ measurements can be directly used as the pixel scale reference over homogeneous surfaces or in the case that the satellite acquisition and in situ measurement footprints are similar, and the upscaling model is not necessary as it has its own source of uncertainty. But the upscaling model is useful for heterogeneous areas when in situ measurement footprints are less than*

325

330

335 *satellite pixel size, because it increases the representativeness of the sampling for direct validation. The accuracy assessment results of pixel scale ground “truth” dataset demonstrate that the accuracy of reference data can be enhanced by 17.09 % over the regions with strong spatial heterogeneity.....” in Conclusion.*

340 As regards to the accuracy of the current coarse resolution surface albedo satellite products, their accuracy (between 0.03 and 0.05) is usually assessed over relatively homogeneous land surfaces. And the validation works over heterogeneous are still rare currently. The spatial scale mismatch over heterogeneous surfaces remains to be challenging to fully understand the overall accuracy of satellite products in different areas. Hence, our dataset can be considered as an important addition to the reference data on the coarse pixel scale over heterogeneous land surfaces.

345 It is not clear which albedo quantities are you comparing: albedo single site, albedo upscaling, reference? You should focus your discussion also based on the different albedo definitions of these quantities (blue-sky, black-sky, etc). It is not clear the spatial coverage of the study. You should clearly indicate the spatial resolution related to all datasets used in this section: albedo single site, albedo upscaling, reference.

350 Re: We are sorry for not making it clear to readers. In fact, it was blue-sky albedo that was used in this study.

The MCD43A3 V061 product was used as an example of coarse resolution satellite albedo products. This product provides local solar noon black sky albedo (BSA) and white sky albedo (WSA). The blue-sky albedo under the actual environment can be calculated as a linear combination of BSA and WSA through the proportion of diffuse irradiation. To clarify this point, we have revised the sentence as “The blue-sky albedo encompasses both direct and diffuse components, characterizing the albedo of the surface under actual atmospheric conditions. It can be expressed as a linear combination of BSA and WSA with an assumption of isotropic distribution of diffuse radiation. In this study, the following equation is used to calculate the MODIS blue-sky albedo.....” in **Section 2.3**.

360 The Landsat ETM+ albedo was used as an example of high-resolution albedo products. The method we employed directly calculates the blue-sky albedo. For clarification, we have revised the sentence as “In this study, we employed the following equation to calculate shortwave blue-sky albedo estimates.” in **Section 2.1**.

365 *In situ* blue-sky albedo was calculated using the ratio of the mean upward radiation to the mean downward radiation around local solar noon. To make this clear to readers, we have added the “*blue-sky*” in **Section 2.1**.

Regarding the spatial coverage of the study, the *in situ* sites are globally distributed as shown in Figure 1. The spatial resolution related to all datasets has been summarized as tables in the above.

The validation of MCD43A3 V0061 using pixel scale ground ‘truth’ is only presented for some sites. The

370 selection of these sites (and not others) should be justified. What is the reason of large differences (outliers)  
over CA-NS2, CA-LP1, IT-Tor ? Additionally, I miss the overall figure using the whole dataset.

Re: In fact, the validation of MCD43A3 V0061 was merely presented as an example for the usage of  
pixel scale ground “truth”. Only parts of the sites were shown for conciseness. These sites are selected  
randomly for each land cover type with consideration of different degrees of spatial heterogeneity. The  
375 overall figure was not shown since the focus of this paper is not comprehensively assess the accuracy of  
satellite albedo products.

There already exist other initiatives, like GBOV (<https://gbov.acri.fr/>), providing similar datasets to that  
presented in this manuscript, and should be mentioned.

380 On the other case, during the manuscript there are comments related to lack of standardized methods and  
operational validation systems for albedo validation. In fact, the CEOS/WGCV LPV subgroup  
(<https://lpvs.gsfc.nasa.gov/>) is coordinating these activities. An operational validation system was recently  
endorsed by CEOS/WGCV LPV, which is called SALVAL (Sánchez-Zapero et al., 2023) and it allows  
albedo products to reach operational and globally representative validation results (CEOS LPV stage 4).  
385 Access to SALVAL is available on <https://calvalportal.ceos.org/salval>

Re: Great thanks for the comment. As suggested by the reviewer, we have added a comment about the  
existing datasets and validation activities in **Introduction** as “*It is important to note that the Copernicus  
Global Terrestrial Monitoring Service partners have instituted a centralized validation database known as  
the Copernicus Global Terrestrial Product Validation Ground-based Observation Dataset (GBOV,  
390 <http://gbov.copernicus.acri.fr>), providing direct access to the set of reference measurements. However, the  
Copernicus GBOV ground-based observation dataset merely comprises 20 stations that provide albedo  
reference data, and the scope of these reference data is inadequate to systematically evaluate remote  
sensing products globally. Thus, our collection of ground-based “truth”, which covers the widest spatial  
range and the longest time series on the coarse pixel scales, is essential to supplement the scientific efforts  
395 on existing albedo datasets and deliver a more precise and consistent albedo reference dataset on the  
coarse pixel scale for heterogeneous regions.” and **Conclusion** as “Currently, a community-based  
validation tool, such as SALVAL (Sánchez-Zapero et al., 2023), could provide a framework for undertaking  
performance assessments through well-defined and uniform procedures, metrics and reference observations  
for all involved datasets, resulting in increased comparability, in addition to the ability to import new  
400 product datasets. Our dataset, obtained through standardized operational procedures, permits expanding  
established datasets to spatially underrepresented sites.”.*

Line 18: ‘in situ’ is not hyphenated. Please review the whole manuscript to homogenize ‘in situ’ term.

Re: This has been corrected in the revised manuscript.

405

Line 64: Remove ‘.’ before references

Re: I've revised the mistake in the article:

Line 145: 'ith' ?

410 Re: 'ith' typically represents a specific index or instance, For example, ' $\alpha_5$ ' might denote the fifth satellite spectral band.
